# Supplementary material for: How Do You Solve a Problem like Letharia? A New Look at Cryptic Species in Lichen-Forming Fungi Using Bayesian Clustering and SNPs from Multilocus Sequence Data
Source: PubMed Central journal article supplement (PMC4022584; doi:10.1371/journal.pone.0097556), 2014-05-15

**A****STRUCTURE  $K = 2$** 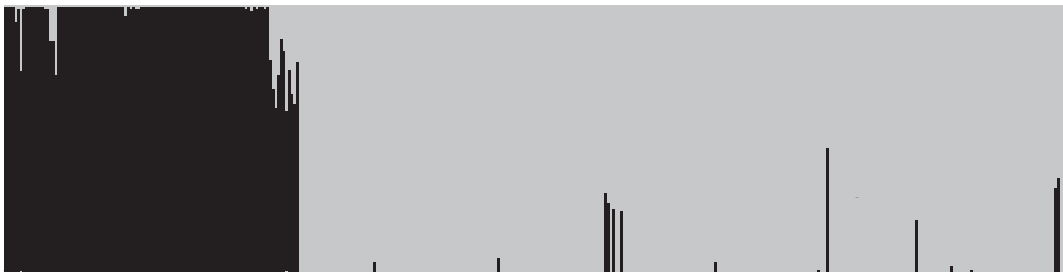**B****BAPS estimated  $K$** 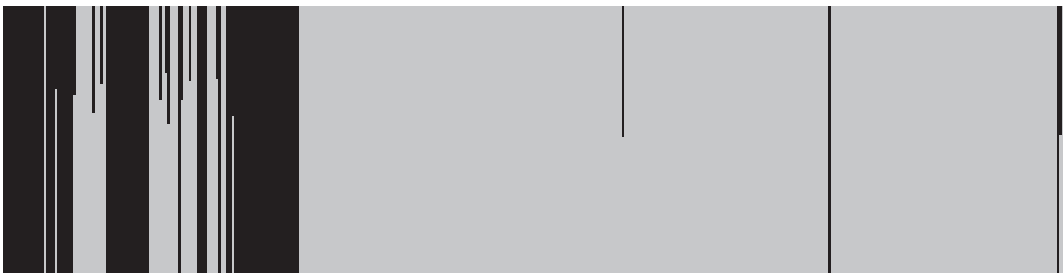**C** $L(K)$  (mean  $\pm$  SD)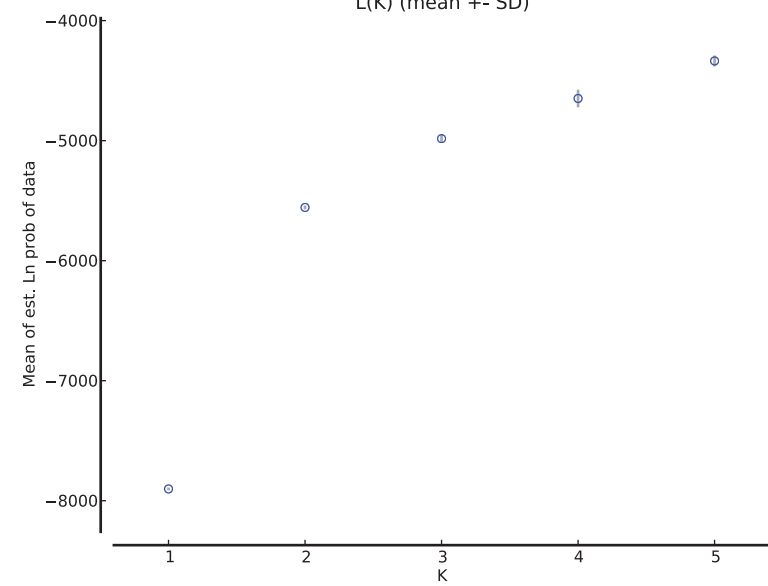**D** $\Delta K = \text{mean}(|L''(K)|) / \text{sd}(L(K))$ 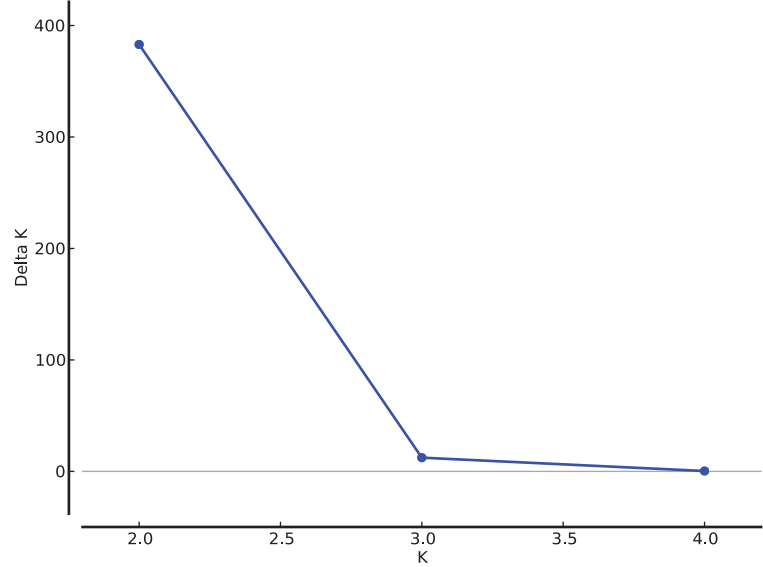

Supplement: pone.0097556.s001.pdf [file pone.0097556.s001.pdf]
