# Supplementary material for: How Do You Solve a Problem like Letharia? A New Look at Cryptic Species in Lichen-Forming Fungi Using Bayesian Clustering and SNPs from Multilocus Sequence Data
Source: PubMed Central journal article supplement (PMC4022584; doi:10.1371/journal.pone.0097556), 2014-05-15

**A**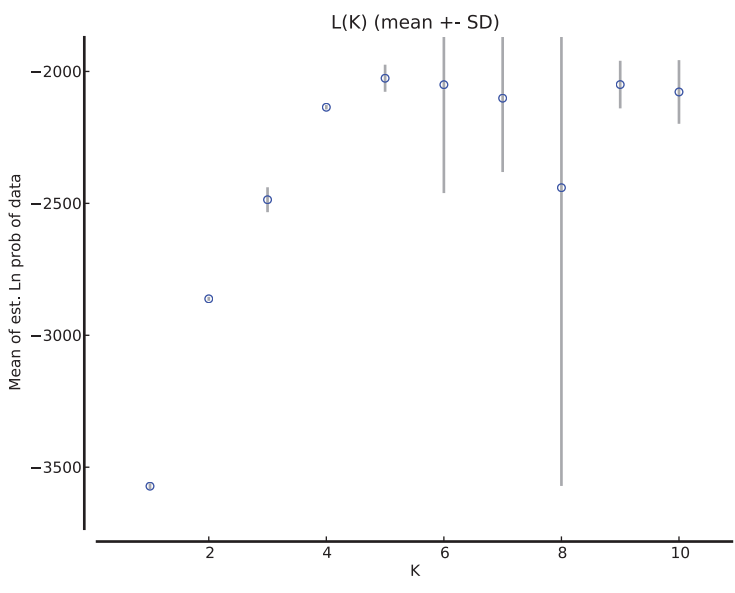**B**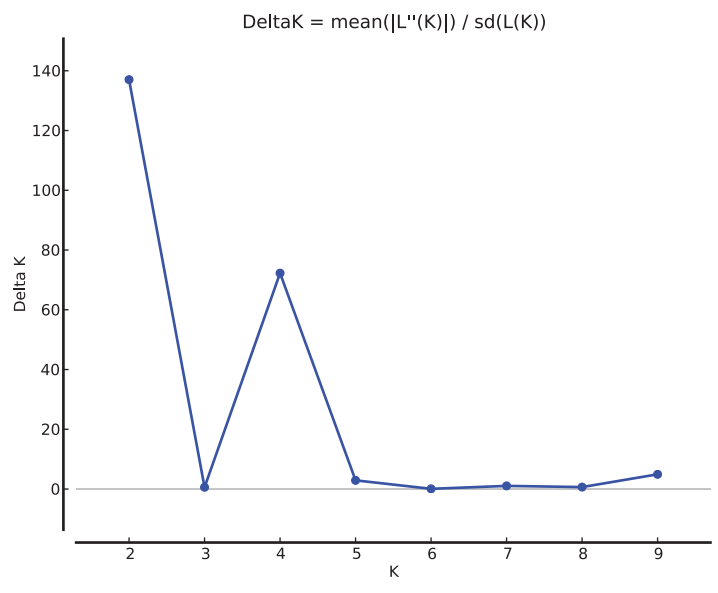

Supplement: pone.0097556.s002.pdf [file pone.0097556.s002.pdf]
